# Supplementary material for: Development and characterization of custom-engineered and compacted nanoparticles as calibration materials for quantification using LA-ICP-MS
Source: Royal Society of Chemistry journal article supplement (doi:10.1039/c4ja00054d), 2014-01-01
Supplement: c4ja00054d1.pdf [file c4ja00054d1.pdf]

### Supplementary information

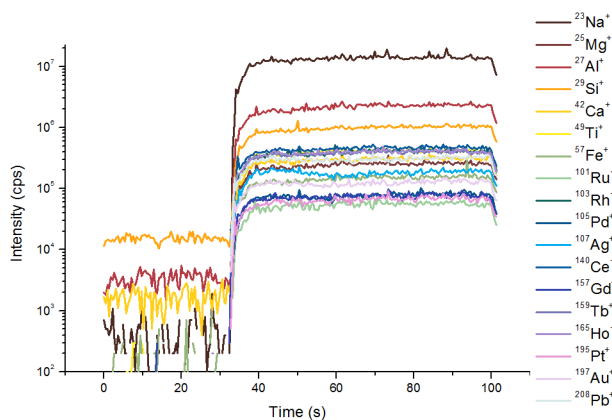

Fig. Transient signal of the ablation of the new material. The repetition rate of the laser was set to 5 Hz, the fluence was  $18 \text{ J/cm}^2$  and the crater size  $60 \mu\text{m}$ .

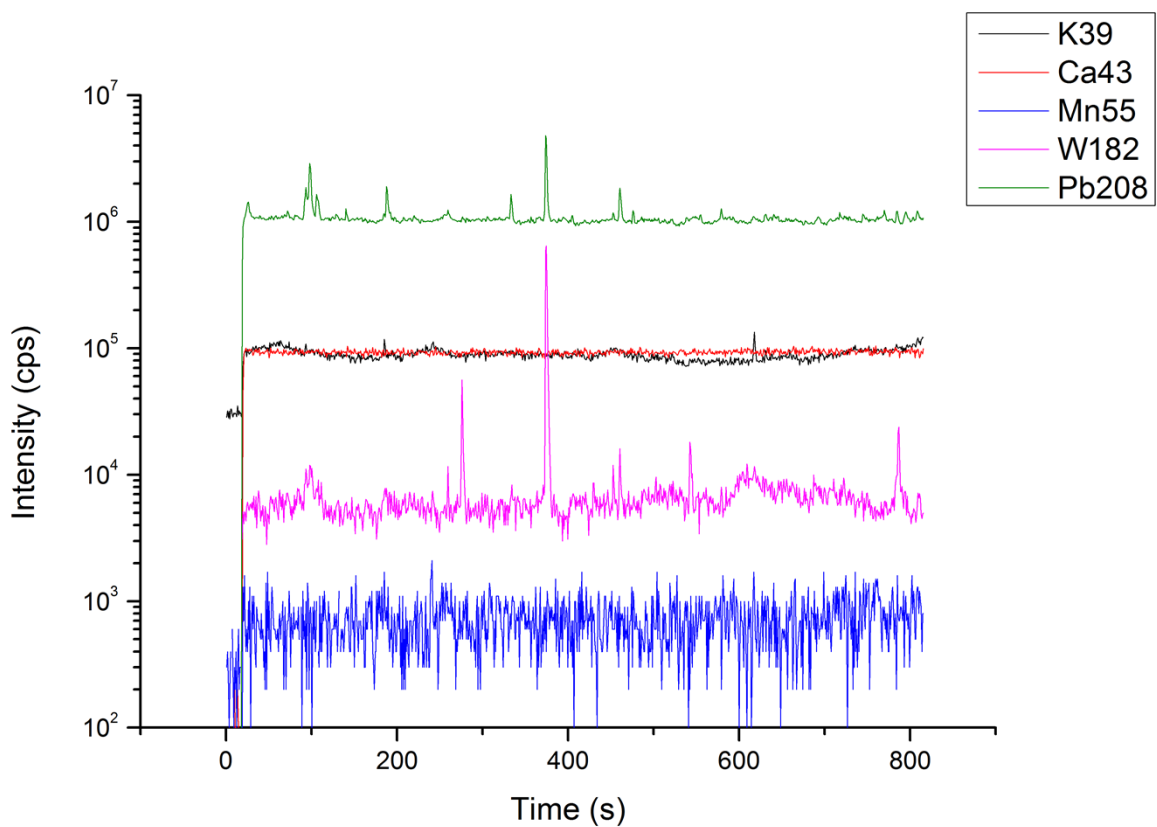

Fig. Linescan ablation of the new material. The repetition rate of the laser was set to 10 Hz, the fluence was  $18 \text{ J/cm}^2$  and the crater size  $89 \mu\text{m}$ . The moving speed was set to  $89 \mu\text{m/s}$ . Data from UTAS
